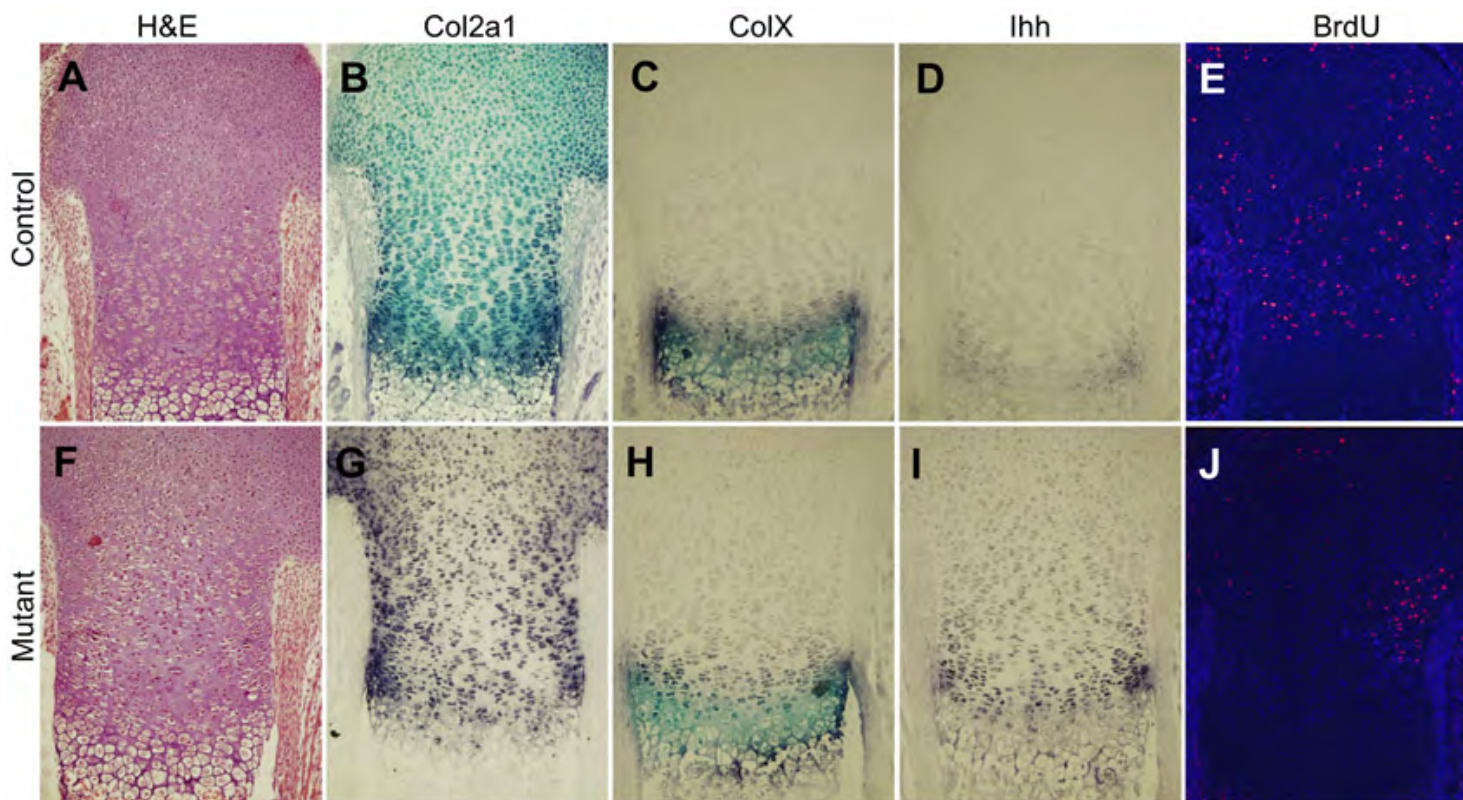

**Fig. S1. Analysis of cell differentiation and proliferation in *Hif1a*-deficient growth plate.** (A-D,F-I) Histological analysis and in situ hybridization of growth plate markers in control (A-D) and *Hif1a*-deficient growth plates (F-I) 48 hours post tamoxifen injection demonstrate that cells in the mutant growth plate are still viable and express typical markers. (E,J) BrdU staining (red) of control (E) and *Hif1a*-deficient (J) growth plate sections indicate a substantial reduction in cell proliferation at the hypoxic central region upon *Hif1a* inactivation. Nuclei are stained with DAPI (blue).

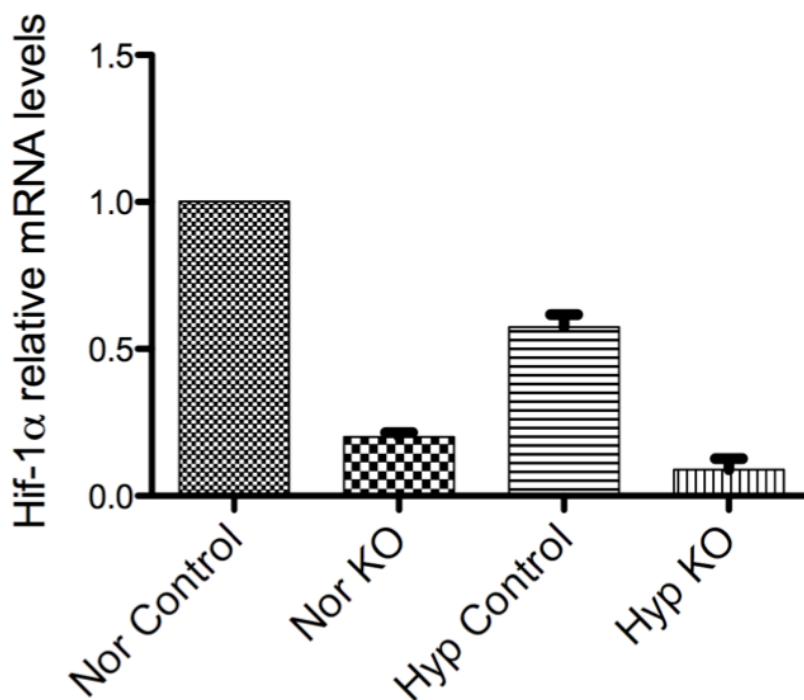

**Fig. S2. *Hif1a* mRNA levels.** This figure relates to Fig. 3G and Fig. 6A. qRT-PCR for *Hif1a* demonstrates an ~80% reduction in gene expression upon *Hif1a* knockout (KO), when compared with the control, both under normoxia and under hypoxia ( $n=3$ ,  $P<0.05$  in both cases, data normalized to *Tbp* and 18S rRNA and represented as mean $\pm$ s.e.m.

| Gene         | Site | Sequence                    | Start     | End   | Strand |
|--------------|------|-----------------------------|-----------|-------|--------|
| <i>Pdk1</i>  | A    | acttcaca <b>CGTG</b> gcagg  | -754      | -738  | +      |
|              | B    | tcctgccca <b>CGTG</b> tgaag | -753      | -737  | -      |
|              | C    | aagacaga <b>CGTG</b> atttt  | -670      | -654  | +      |
|              | D    | aacagggga <b>CGTG</b> cgact | +442      | +458  | +      |
|              | E    | tagtcgc <b>ACGT</b> ccctgt  | +443      | +459  | -      |
|              | F    | tccgcgca <b>CGTG</b> cgtag  | +531      | +547  | +      |
|              | G    | cctacgca <b>CGTG</b> cgcg   | +532      | +548  | -      |
| <i>P4ha1</i> | A    | tagccta <b>ACGT</b> gacaga  | -316<br>7 | -3151 | -      |
|              | B    | cctcgcta <b>CGTG</b> cgctc  | -21       | -5    | -      |
| <i>P4ha2</i> | A    | atcgcata <b>CGTG</b> cagcg  | -85       | -69   | +      |
|              | B    | accacaga <b>CGTG</b> atact  | +888      | +904  | -      |
| <i>P4hb</i>  | A    | cttccac <b>ACGT</b> ctggaa  | -288      | -272  | +      |
|              | B    | attccaga <b>CGTG</b> tggaa  | -289      | -273  | -      |
|              | C    | ccgtcgaa <b>CGTG</b> gcagt  | -378      | -362  | +      |
|              | D    | ccgagaaa <b>CGTG</b> cccgc  | -645      | -629  | -      |

**Table S1. Potential binding sites of HIF1 $\alpha$  on the gene sequences of *Pdk1* and cP4H subunits.** The sequences and positions of HIF1 $\alpha$  potential binding sites identified on *Pdk1* (mouse chr2:71706329-71712328), *P4ha1* (mouse chr10:58781044-58787043), *P4ha2* (mouse chr11:53909426-53915426) and *P4hb* (mouse chr11:120433251-120439250) genes, and analyzed by ChIP in Fig. 5D and Fig. 6D (+1 is the transcription start site). Highlighted is the core consensus sequence (four nucleotides).

| qRT-PCR primers      |                          |                          |
|----------------------|--------------------------|--------------------------|
| Primer name          | Forward                  | Reverse                  |
| Hif-1 $\alpha$       | AGATCTCGGCGAAGCAAAGAGT   | CGGCATCCAGAAGTTTTCTCACAC |
| Tbp                  | GCAGCCTCAGTACAGCAATCAACA | GGTGCAGTGGTCAGAGTTTGAGAA |
| 18S rRNA             | GTAACCCGTTGAACCCCAT      | CCATCCAATCGGTAGTAGCG     |
| Chop                 | TGTTGAAGATGAGCGGGTGGCA   | GGACCAGGTTCTGCTTTCAGGTGT |
| BiP                  | GGGACCACCTATTCCTGCGTC    | ATACGACGGCGTGATGCGGT     |
| Pdk1                 | GACTGTGAAGATGAGTGACCGGGG | CGTTTCAACACGAGGCCGGG     |
| P4ha1                | AGGACATGTCCGATGGCTTCATCT | TCTTGCAGCCGAAACAGAGCTT   |
| P4ha2                | AGGTGTTGGTGTGGTGTGCT     | TGTACCAGGTCCTTCTCTGCGTAA |
| P4h $\beta$          | CAGATGAGCTGACGGCTGAGAAAA | CTTCAAAGTTCGCCCAACCAGTA  |
| ChIP primers         |                          |                          |
| Primer name          | Forward                  | Reverse                  |
| Pdk1 site A-C        | AACTTCACACGTGGCAGGATAGT  | ACCCACGAAAATCACGTCTGTCT  |
| Pdk1 site D-G        | CTGGAAGGCCGGGCACGTAA     | AGACACCAGGTCCCAAGCG      |
| P4ha1 site A         | GTGTCCCACCACGAGATGCCA    | GCCAGGTGTAGCAGGCTCACAAT  |
| P4ha1 site B         | ACAGAGCGCACGTAGCGAGG     | TGCGACTGGGCAGTAGAGGGA    |
| P4ha2 site A         | TGGTGCCGGTCCCACGC        | CGAGCCACTGGAGCCTTCGG     |
| P4ha2 site B         | ATCACCTGAGTGGCCGCAA      | GTGGGGCCCTTGGACAGCTA     |
| P4h $\beta$ site A-C | TCCCACGCCTTCCACACGTC     | CCACTGCCACGTTTCGACGGA    |
| P4h $\beta$ site D   | TCGGGGTCCGGTGTCTGTGC     | TGGTGGACAGGAGCCTCGGA     |

**Table S2. List of primers.** The sequences of the primers used for the qRT-PCR assay and the in vivo ChIP assay are listed.
